# Supplementary material for: From the index case to global spread: the global mobility based modelling of the COVID-19 pandemic implies higher infection rate and lower detection ratio than current estimates
Source: PeerJ. 2020 Jul 10;8:e9548. doi: 10.7717/peerj.9548 (PMC7357567; doi:10.7717/peerj.9548)
Supplement: Supplemental Information 2 [file peerj-08-9548-s002.xlsx]

## Sheet: Parameters
Name	Value
tDR	0.0061
pS	0.01
pDS	0.6
μ	7
pDM	0.00010101
diagnosed	1.443e-05
recovered	0.142843
population	16714154

## Sheet: Cases
	New Cases Daily			Number of infected - mild and asymptomatic cases
Timestep	Lower 95%CI	Median	Upper 95%CI	Lower 95%CI	Average	Upper 95%
0	0	0	0	0	0	0
1	0	0	0	0	0	0
2	0	0	0	0	0	0
3	0	0	0	0	0	0
4	0	0	0	0	0	0
5	0	0	0	0	0	0
6	0	0	0	0	0	0
7	0	0	0	0	0	0
8	0	0	0	0	0	0
9	0	0	0	0	0	0
10	0	0	0	0	0	0
11	0	0	0	0	0	0
12	0	0	0	0	0	0
13	0	0	0	0	0	0
14	0	0	0	0	0	0
15	0	0	0	0	0	0
16	0	0	0	0	0	0
17	0	0	0	0	0	0
18	0	0	0	0	0	0
19	0	0	0	0	0	0
20	0	0	0	0	0	0
21	0	0	0	0	0	0
22	0	0	0	0	0	0
23	0	0	0	0	0	0
24	0	0	0	0	0	0
25	0	0	0	0	0	0
26	0	0	0	0	0	0
27	0	0	0	0	0	0
28	0	0	0	0	0	0
29	0	0	0	0	0	0
30	0	0	0	0	0	0
31	0	0	0	0	0	0
32	0	0	0	0	0	0
33	0	0	0	0	0	0
34	0	0	0	0	0	0
35	0	0	0	0	0	0
36	0	0	0	0	0	0
37	0	0	0	0	0	0
38	0	0	0	0	0	0
39	0	0	0	0	0	0
40	0	0	0	0	0	0
41	0	0	0	0	0	0
42	0	0	0	0	0	0
43	0	0	0	0	0	0
44	0	0	0	0	0	0
45	0	0	0	0	0	0
46	0	0	0	0	0	0
47	0	0	0	0	0	0
48	0	0	0	0	0	0
49	0	0	0	0	0	0
50	0	0	0	0	0	0
51	0	0	0	0	0	0
52	0	0	0	0	0	0
53	0	0	0	0	0	0
54	0	0	0	0	0	0
55	0	0	0	0	0	0
56	0	0	0	0	0	0
57	0	0	0	0	0	0
58	0	0	0	0	0	0
59	0	0	0	0	0	0
60	0	0	0	0	0	0
61	0	0	0	0	0	0
62	0	0	14.6249	0	0	14.6249
63	0	0	17.5833	0	0	17.5833
64	0	0	24.5698	0	0	24.5698
65	0	0	26.1577	0	0	26.1577
66	0	0	20.057	0	0	20.057
67	0	1.50427	37.5233	0	1.50427	37.5233
68	0	1.00285	52.2484	1.28938	2.29223	53.5378
69	0	2.0057	54.8224	1.96477	3.97046	56.7872
70	0	2.0057	79.0078	3.40326	5.40895	82.4111
71	0	4.49611	94.6523	4.63625	9.13235	99.2885
72	0	6.50181	123.05	7.82773	14.3295	130.877
73	0	6.00038	145.146	12.2825	18.2828	157.428
74	0	7.00323	193.65	15.671	22.6742	209.321
75	0	7.50466	207.356	19.4351	26.9397	226.791
76	0.467996	13.0036	265.421	23.5592	36.0948	288.512
77	0	16.9983	341.203	30.9384	47.9367	372.141
78	0.952707	22.4973	409.129	42.0413	63.5858	450.218
79	0	27.9962	525.092	54.5022	82.4984	579.594
80	0.467996	34.9994	658.203	71.1809	105.712	728.916
81	2.99183	48.5045	804.452	93.6024	139.115	895.063
82	1.00285	48.5045	998.42	120.244	167.746	1117.66
83	2.94169	83.0025	1228.22	146.724	226.785	1372.01
84	4.47939	92.4961	1485.4	198.866	286.883	1679.79
85	6.95309	116.498	1891.56	252.853	362.397	2137.46
86	9.37664	141.502	2413.98	320.003	452.128	2724.6
87	4.94739	194.001	2892.3	392.486	581.54	3279.84
88	8.89193	241.001	3689.45	507.355	739.464	4187.91
89	12.9535	295.506	4549.21	646.78	929.333	5183.03
90	14.2739	411.502	5676.33	810.845	1208.07	6472.9
91	22.8482	502.494	6991.35	1058.34	1537.99	8026.84
92	29.5506	620.998	8673.53	1347.82	1939.27	9991.8
93	29.6509	819.495	10676.6	1691.88	2481.73	12338.8
94	38.7936	1023.51	13203	2165.99	3150.7	15330.2
95	57.2293	1304.51	16391.9	2757.83	4005.11	19092.5
96	74.2276	1652.49	20418.5	3507.18	5085.45	23851.5
97	96.4072	2046.5	25211	4455.36	6405.45	29569.9
98	128.799	2659	31454.9	5619.19	8149.39	36945.2
99	163.03	3235.49	38461	7148.22	10220.7	45446.1
100	199.951	4160.5	47705.1	8960.54	12921.1	56465.7
101	228.549	5261	58869.7	11303.8	16336.2	69944.9
102	297.378	6508.01	72423.4	14299.9	20510.5	86425.8
103	406.121	8108	89167	17986.5	25688.4	106747
104	491.229	10152	108966	22509.9	32170.6	130985
105	618.992	12831.5	133310	28193.8	40406.3	160885
106	785.9	16117.5	161485	35419.9	50751.5	196119
107	1017.26	20084.5	196858	44518.5	63585.8	240359
108	1244.45	25095	235913	55746.5	79597.1	290415
109	1591.77	31012.5	282524	69817.9	99238.6	350750
110	2021.58	38603.5	335096	87083.2	123665	420158
111	2471.72	48095	392294	108470	154094	498293
112	3094.89	59380.5	455187	135175	191461	587267
113	3882.98	73544.5	523854	167992	237654	687963
114	4852.95	90635	591016	208556	294338	794719
115	6056.51	111280	656905	258346	363569	909195
116	7681.16	136757	717233	319312	448388	1.02886e+06
117	9558.11	166215	768046	393891	550548	1.15238e+06
118	11819.6	201688	806463	483718	673586	1.27836e+06
119	15025.3	243673	828861	592385	821033	1.40622e+06
120	18550.8	291569	833089	722293	995312	1.53683e+06
121	23337.1	346479	836156	876461	1.1996e+06	1.68928e+06
122	28721.6	407661	836770	1.05695e+06	1.43589e+06	1.865e+06
123	35900.6	473975	820855	1.26667e+06	1.70474e+06	2.05162e+06
124	44353.5	543500	830757	1.50556e+06	2.00471e+06	2.29196e+06
125	55019.1	605931	842991	1.77334e+06	2.32425e+06	2.56131e+06
126	67798.5	657050	839809	2.06001e+06	2.64926e+06	2.83202e+06
127	83500.7	628051	842939	2.3543e+06	2.89885e+06	3.11374e+06
128	103330	625669	845402	2.58806e+06	3.1104e+06	3.33013e+06
129	125889	693064	842809	2.79194e+06	3.35912e+06	3.50886e+06
130	154015	673621	844854	3.03326e+06	3.55287e+06	3.7241e+06
131	187187	720204	846156	3.2325e+06	3.76552e+06	3.89147e+06
132	220597	701108	837052	3.44818e+06	3.9287e+06	4.06464e+06
133	224653	639028	844623	3.59211e+06	4.00648e+06	4.21208e+06
134	193960	582813	841850	3.62809e+06	4.01694e+06	4.27598e+06
135	167472	575278	841724	3.61056e+06	4.01837e+06	4.28481e+06
136	144206	511944	829116	3.58852e+06	3.95626e+06	4.27343e+06
137	124337	514570	799010	3.51542e+06	3.90565e+06	4.19009e+06
138	107246	495233	780029	3.45495e+06	3.84293e+06	4.12773e+06
139	92621.2	435329	774219	3.38656e+06	3.72927e+06	4.06816e+06
140	79652.2	378702	798591	3.27617e+06	3.57522e+06	3.99511e+06
141	67798.3	328348	820968	3.13227e+06	3.39282e+06	3.88544e+06
142	57878.2	281966	826038	2.96601e+06	3.1901e+06	3.73417e+06
143	49579.8	241149	836058	2.78395e+06	2.97552e+06	3.57043e+06
144	42488	205517	842804	2.59293e+06	2.75596e+06	3.39325e+06
145	36500.3	175580	831990	2.39875e+06	2.53783e+06	3.19424e+06
146	31085.1	149413	803823	2.20637e+06	2.3247e+06	2.97911e+06
147	26731.3	127483	762508	2.01933e+06	2.12008e+06	2.75511e+06
148	22915.4	108063	710603	1.84013e+06	1.92528e+06	2.52782e+06
149	19648.8	91919.5	650056	1.66989e+06	1.74216e+06	2.30029e+06
150	17144.4	77957	587451	1.51042e+06	1.57123e+06	2.08073e+06
151	14518.9	66203	523831	1.36129e+06	1.41298e+06	1.8706e+06
152	12554.3	56335.5	461497	1.22368e+06	1.26746e+06	1.67262e+06
153	10915.5	47941.5	404076	1.09731e+06	1.13433e+06	1.49047e+06

## Sheet: CIs
	Lower 95%CI	Upper 95%CI
Observed	0.109	0.21
Predicted	0.189251	0.230332
